# Supplementary material for: In vitro cultivation of biopsy derived primary hepatocytes leads to a more metabolic genotype in perfused 3D scaffolds than static 3D cell culture
Source: Royal Society of Chemistry journal article supplement (doi:10.1039/c3ra42358a), 2013-01-01
Supplement: c3ra42358a.pdf [file c3ra42358a.pdf]

## SUPPLEMENTS

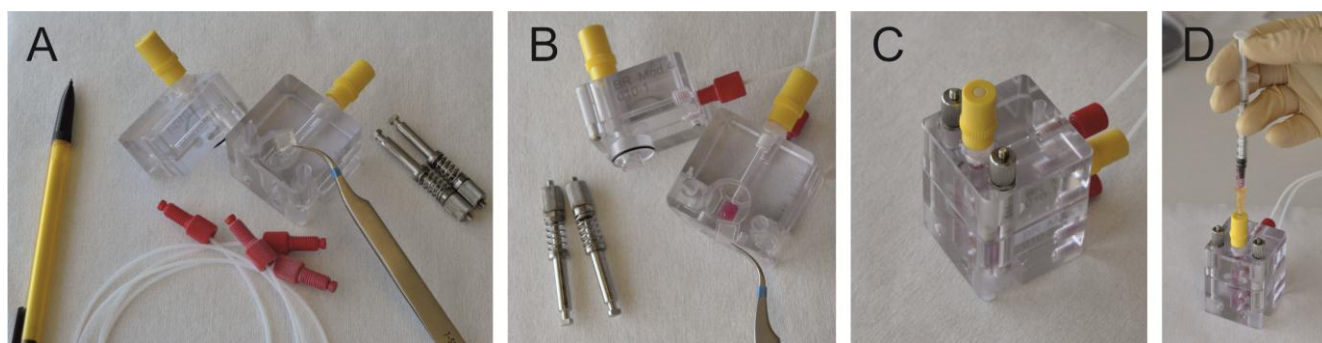

**Fig.S1.** The easy to handle micro bio reactor consists of 2 modules which need to be assembled and connected to tubings (A). For 3D perfused cell cultivation, the micro bio reactor is filled with cultivation medium and prepared for insertion of MatriGrid (B). The now fully assembled and secured system is ready for incubation (C). A septum allows for easy sample taking for further analysis (D).

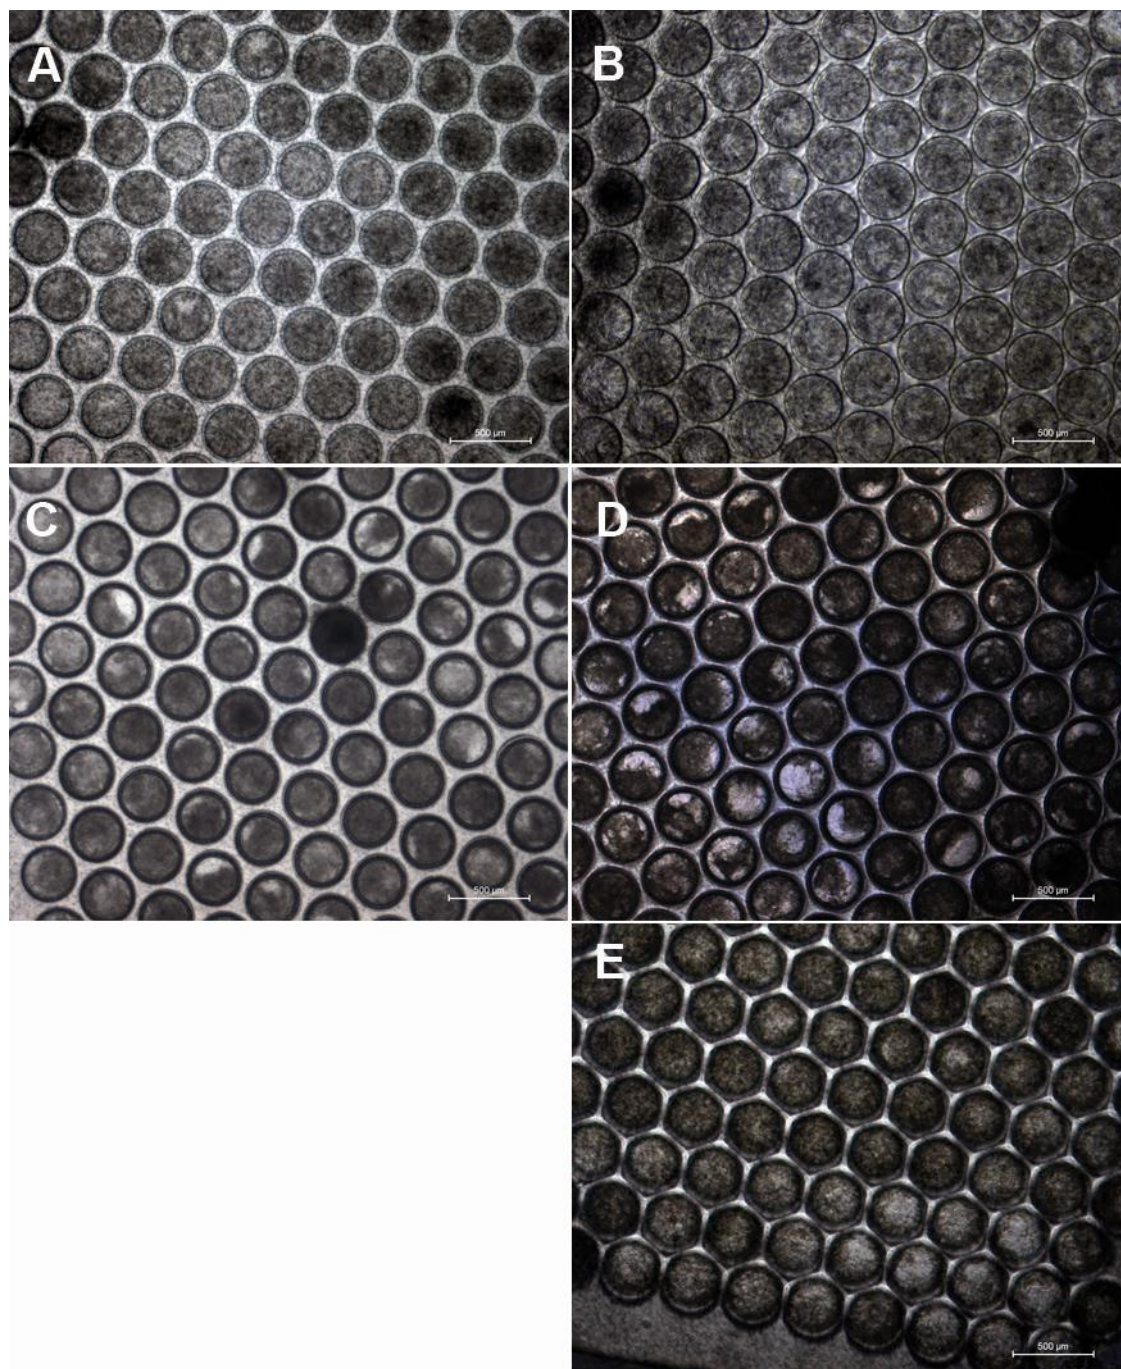

**Fig.S2.** Documentation of homogeneity of cell seeding after 5 days of cultivation in independent MatriGrids under static (A,C) and perfused conditions (B,D,E). The bar =500μm.

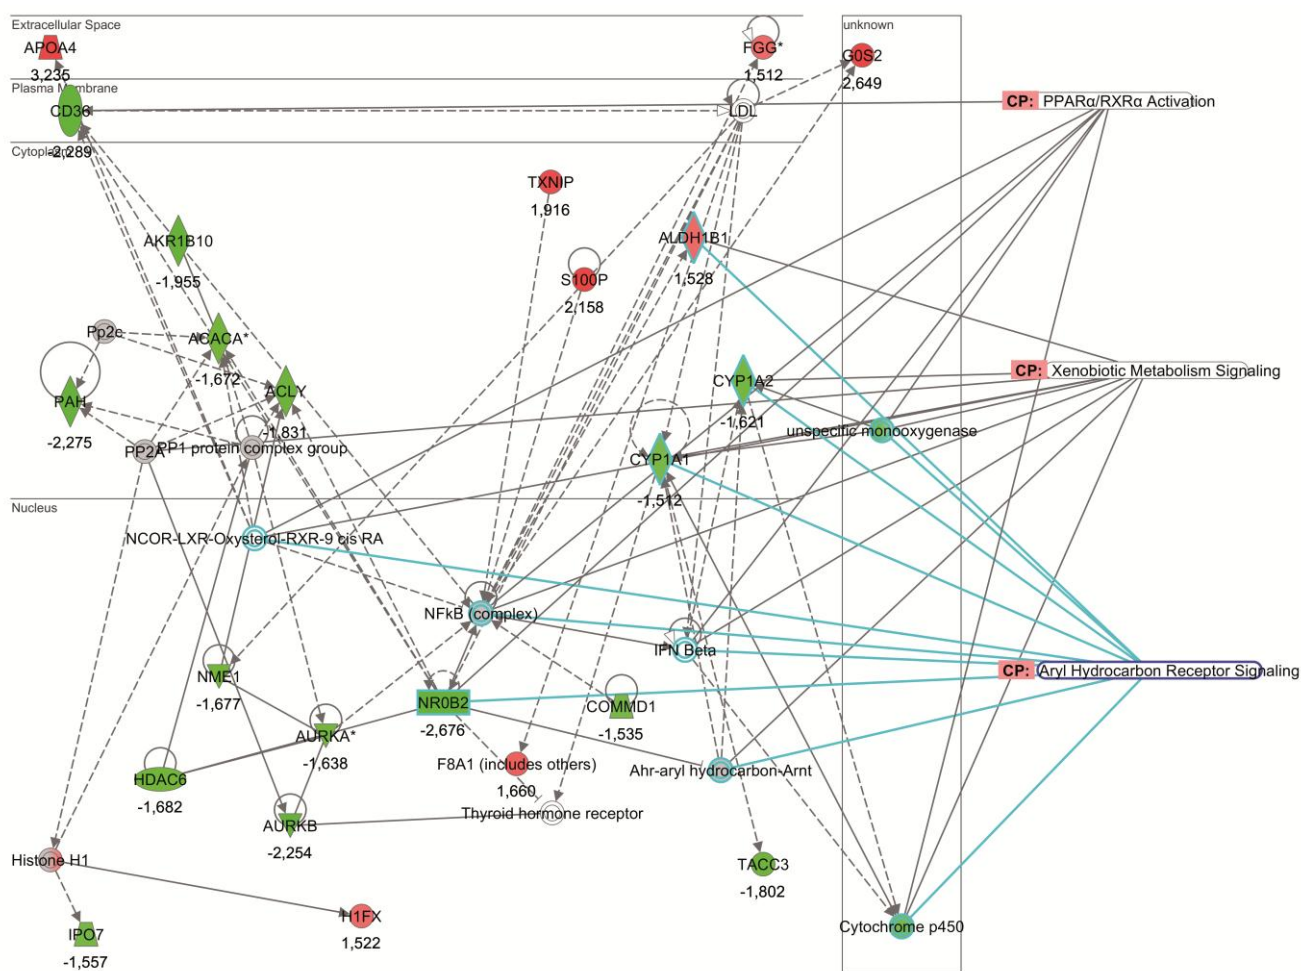

**Fig.S3.** Gene network “Lipid metabolism, small molecule biochemistry, vitamin and mineral metabolism” for a static 3D cell cultivation of biopsy derived primary hepatocytes of Patient 2. Major enzyme function involved in metabolism is downregulated under static conditions. Up regulated genes appear red while down regulated molecules are toned green. The intensity of the node colour indicates the degree of upregulation. Genes in uncolored nodes were not identified as differentially expressed and were implemented on the basis of evidence stored in IPA knowledge base. The node shapes signify enzymes  $\diamond$ , transcription factors  $\circ$ , transporters  $\triangle$ , growth factors  $\square$ , other  $\circ$ .

**Table S1.** Flow resistance of MatriGrids<sup>a</sup> before and after cell seeding

| MatriGrid, nontreated                                                |      | Collagen- coated MatriGrid |      | Collagen- coated MatriGrid 24h after cell seeding |      |
|----------------------------------------------------------------------|------|----------------------------|------|---------------------------------------------------|------|
| Flow resistance correlated to a relative pore size [ $\mu\text{m}$ ] |      |                            |      |                                                   |      |
| Mean                                                                 | SD   | Mean                       | SD   | Mean                                              | SD   |
| 2,28                                                                 | 0,10 | 1,27                       | 0,30 | 1,49                                              | 0,46 |

<sup>a</sup> A number of 6 MatriGrids were analysed per test.

**Table S2.** Comparison of different bioreactor types

| Source             | Type of bioreactor                | Operating volume | Material                     | Medium Flow Rate                 | 3D support                                                                                                                                           | Cell type                       | Cell seeding number     | Cultivation period (days) | Citation |
|--------------------|-----------------------------------|------------------|------------------------------|----------------------------------|------------------------------------------------------------------------------------------------------------------------------------------------------|---------------------------------|-------------------------|---------------------------|----------|
| Domansky et al.    | open well multichamber bioreactor | 3ml              | Polycarbonate/ Polystyrene   | 250 $\mu\text{l}/\text{min}$     | ECM-coated polymer wafer with 769 $\mu\text{m}$ channels (depth 240 $\mu\text{m}$ , diameter 340mm), backed by porous filter (5 $\mu\text{m}$ Pores) | primary rat hepatocytes         | 0,4-0,6*10 <sup>6</sup> | 7                         | 12       |
| Vinci et al.       | Multichamber modular bioreactor   | 2-3ml            | Silicone                     | 250-500 $\mu\text{l}/\text{min}$ | collagen sandwich                                                                                                                                    | primary human hepatocytes       |                         | 14                        | 28       |
| Hongo et al.       | Radial flow bioreactor            | 5ml              |                              |                                  | SIRAN, hydroxyapatite, calcine cattle bone calcium powder, polyurethane foam                                                                         | HepG2 cells                     |                         | 17                        | 38       |
| Prot et al.        | Microfluidic biochip              | 40 $\mu\text{l}$ | PDMS                         | 10 $\mu\text{l}/\text{min}$      | Microfluidic biochip                                                                                                                                 | HepG2 cells                     | 0.25*10 <sup>6</sup>    | 4                         | 9        |
| Lübberstedt et al. | hollow-fibre membrane bioreactor  | 0.5ml            | Polyurethane                 | 0.5ml/h                          | hollow fiber membranes surrounding injected cells                                                                                                    | primary human hepatocytes       | 2*10 <sup>7</sup>       | 10                        | 4        |
| Schütte et al.     | HepaChip                          | n.a.             | cyclic olefin polymers (COP) | 3 $\mu\text{l}/\text{min}$       | collagen- coated microchannels                                                                                                                       | Cryopreserved human hepatocytes |                         | 1                         | 10       |
| Fernekom et al.    | Modular monobioreactor            | 1.4ml            | Polycarbonate                | 25 $\mu\text{l}/\text{min}$      | collagen-coated microporous polycarbonate scaffold (200 $\mu\text{m}$ depth, 300 $\mu\text{m}$ diameter)                                             | primary human hepatocytes       | 1*10 <sup>6</sup>       | 5                         |          |
